# Supplementary material for: Initial clinical experience with durvalumab plus tremelimumab in patients with unresectable hepatocellular carcinoma in real‑world practice
Source: PubMed Central journal article supplement — Oncol Lett. 2024 Jun 25;28(2):397. doi: 10.3892/ol.2024.14530 (PMC11228928; doi:10.3892/ol.2024.14530), 2024-06-25

Figure S1. Study design. A total of 139 patients with HCC were enrolled. During the study, 19 patients were excluded, and data from 120 patients with HCC were analyzed. HCC, hepatocellular carcinoma; PS, performance status; BCLC, Barcelona Clinic Liver Cancer.

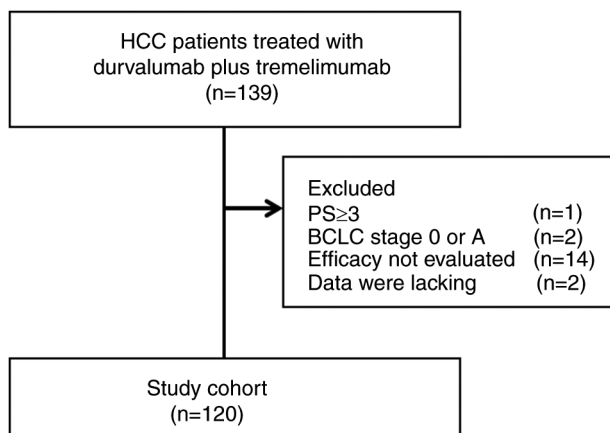

Figure S2. Change in ALBI score at 4, 8 and 12 weeks from baseline during Dur/Tre treatment. ALBI, albumin-bilirubin; Dur/Tre, durvalumab plus tremelimumab.

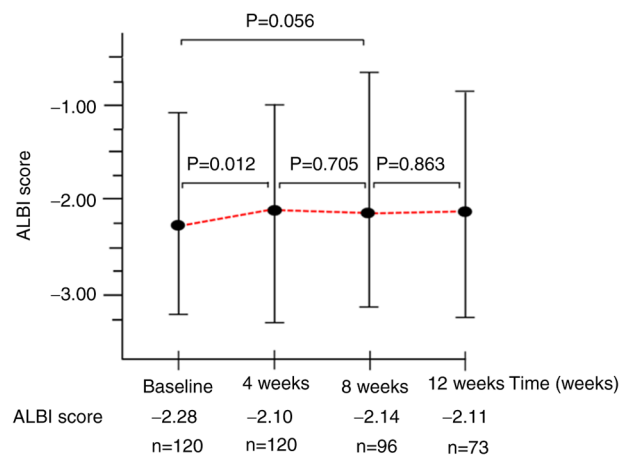

Supplement: Supplementary_Data.pdf [file Supplementary_Data.pdf]
